# Supplementary material for: Solvent-free, mechanochemical syntheses of bulk trihalide perovskites and their nanoparticles
Source: Royal Society of Chemistry journal article supplement (doi:10.1039/c7cc00666g), 2017-01-01
Supplement: c7cc00666g1.pdf [file c7cc00666g1.pdf]

## Supporting Information

### Solvent-free, mechanochemical syntheses of bulk trihalide perovskites and their nanoparticles

Atanu Jana, Mona Mittal, Aayushi Singla, Sameer Sapra\*

Department of Chemistry, Indian Institute of Technology Delhi, Hauz Khas, New Delhi 110016, India.

### Table of contents

|                                                                                                                                                                                           |       |
|-------------------------------------------------------------------------------------------------------------------------------------------------------------------------------------------|-------|
| <b>Experimental procedures</b> .....                                                                                                                                                      | S2    |
| <b>Spectroscopy and Microscopy Characterization</b> .....                                                                                                                                 | S3-S4 |
| <b>Table S1:</b> Amount of starting material.....                                                                                                                                         | S5    |
| <b>Table S2:</b> Time-resolved photoluminescence data for APbBr <sub>3</sub> NPs.....                                                                                                     | S5    |
| <b>Figure S1:</b> Thermogravimetric analyses of bulk MAPbBr <sub>3</sub> , FAPbBr <sub>3</sub> and CsPbBr <sub>3</sub> . ....                                                             | S6    |
| <b>Figures S2:</b> PXRD patterns of MAPbBr <sub>3</sub> during the course of reaction, PbBr <sub>2</sub> and MABr precursors.....                                                         | S7    |
| <b>Figure S3:</b> TEM images of (a) FAPbBr <sub>3</sub> (b) CsPbBr <sub>3</sub> , and (c) MAPbBr <sub>3</sub> NPs.....                                                                    | S8    |
| <b>Figure S4.</b> A representative energy dispersive X-ray (EDX) spectroscopy analysis of bulk (a) CsPbBr <sub>3</sub> , (b) MAPbBr <sub>3</sub> and (c) FAPbBr <sub>3</sub> .....        | S9    |
| <b>Figure S5.</b> A representative energy dispersive X-ray (EDX) spectroscopy analysis of (a) CsPbBr <sub>3</sub> , (b) MAPbBr <sub>3</sub> and (c) FAPbBr <sub>3</sub> nanocrystals..... | S10   |
| <b>Figure S6.</b> Time-resolved photoluminescence decays of APbBr <sub>3</sub> NPs.....                                                                                                   | S11   |
| <b>Equation S1.</b> Calculation of quantum yield of APbBr <sub>3</sub> NPs .....                                                                                                          | S9    |

## Experimental Procedures

**Materials:** Lead (II) bromide ( $\text{PbBr}_2$ , 99.999%, Alpha Aesar), methylamine solution ( $\text{CH}_3\text{NH}_2$ , 40%, Sd fine chemical limited), n-octylamine ( $\text{CH}_3(\text{CH}_2)_7\text{NH}_2$ , 99%, Spectrochem), hydrobromic acid (HBr, 48%, SRL), formamidine acetate [ $(\text{NH}=\text{CH}(\text{NH}_2))_2\text{CH}_3\text{COOH}$ , 99%, Sigma-Aldrich], acetone (99%, EMPLURA), toluene (99.5%, Fisher Scientific) and ether (98%, Fisher Scientific). All chemicals were used as received.

### Methods:

**Methylammonium bromide ( $\text{CH}_3\text{NH}_3\text{Br}$ ) and n-octylammonium bromide ( $\text{CH}_3(\text{CH}_2)_7\text{NH}_3\text{Br}$ ):** Bromide salt of methylamine and n-octylamine were synthesized by previously reported method.<sup>1</sup> HBr (83.33 mL, 0.5 mol) was added drop-wise to methylamine (42.86 mL, 0.5 mol) or n-octylamine (82.74 mL, 0.5 mol) dissolved in 50 mL ethanol at 0 °C under magnetic stirring and it was continued for 3 hr. Excess ethanol was removed by rotary evaporator keeping the water bath temperature at 60 °C. The solid was redissolved in ethanol and then it was reprecipitated by adding ether. This process was repeated for four times. At last, the solid was dried under vacuum, a snow-white crystalline material was formed, which was stored inside the glove box for further use.

**Formamidine bromide (FABr):** FABr was synthesized according to a literature method.<sup>2</sup> Formamidine acetate (10 gm, 0.096 mol) was dissolved in 32 ml (0.0192 mol) 48% HBr under stirring condition and stirring was continued for another 30 minutes. The solvent was removed by evaporation. Then, it was dissolved in ethanol and reprecipitated with ether. The process was repeated for three times and the white product was dried in vacuum at 60 °C.

**Bulk  $\text{APbBr}_3$  (A= Cs/FA/MA):**  $\text{PbBr}_2$  (36.7 mg, 0.1 mmol) and  $\text{CH}_3\text{NH}_3\text{Br}$  (11.2 mg, 0.1 mmol) were grinded with a mortar and pestle at room temperature. An orange color solid was immediately formed. The grinding was continued for another 10 minutes to achieve complete conversion. Then 2 ml acetone was added to it and centrifuged at 5000 rpm for 2 minutes. Supernatant was discarded. The product was dried in vacuum.

FAPbBr<sub>3</sub> and CsPbBr<sub>3</sub> were prepared according to the above procedure. Formamidine bromide (12.5 mg, 0.1 mmol) and CsBr were taken instead of MABr to prepare yellowish orange colored FAPbBr<sub>3</sub> and light yellow colored CsPbBr<sub>3</sub> respectively. In all the cases yield is more than 98%.

**APbBr<sub>3</sub> (A= Cs/FA/MA) NPs:** In a typical synthesis of MAPbBr<sub>3</sub>, PbBr<sub>2</sub> (36.7 mg, 0.1 mmol), CH<sub>3</sub>NH<sub>3</sub>Br (11.2 mg, 0.1 mmol) and n-octylammonium bromide (12.6 mg, 0.06 mmol) were grinded with a mortar and pestle at room temperature. An orange color solid was observed immediately. This colored solid was grinded for another 10 minutes. Then 2 ml acetone was added to it and centrifuged at 5000 rpm for 2 minutes. Supernatant was discarded. The product was dried in vacuum.

FAPbBr<sub>3</sub> and CsPbBr<sub>3</sub> were prepared according to the above procedure. Formamidine bromide (12.5 mg, 0.1 mmol) and CsBr (21.2 mg, 0.1 mmol) were taken instead of MABr to prepare FAPbBr<sub>3</sub> and CsPbBr<sub>3</sub> NPs, respectively. In all the cases yield is more than 98%.

### **Spectroscopy and Microscopy Characterization**

**UV-visible measurements:** Absorption spectra were collected with a Perkin-Elmer Lambda 1050 spectrophotometer using 1 cm quartz cuvette over the range of 320-800 nm. **Photoluminescence studies:** The fluorescence spectra were recorded on Perkin-Elmer LS-55 spectrometer with constant 10 nm excitation and 5 nm emission slit width with an excitation wavelength of 377 nm. The photoluminescence quantum yields (PL-QY) of the synthesized NPs were calculated using fluorescein as a standard (QY 0.79 in ethanol).

**Thermogravimetry (TGA) Instruments:** The thermogravimetric analyses were performed using Perkin Elmer instruments. The data was collected from 40 °C to 900 °C at a heating rate of 10 °C/min under N<sub>2</sub> flow.

**Transmission Electron Microscopy images (TEM):** TEM images were captured using JEOL instruments.

**X-ray Diffraction (XRD):** Powder X-ray diffraction (PXRD) patterns were collected on a Bruker D8 Advance Diffractometer with Ni-filtered Cu K<sub>α</sub> radiation.

**Energy dispersive X-ray (EDX).** Elemental analysis was performed using TM3000 table top microscope Hitachi with an accelerating voltage of 15kV equipped with an EDX detector.

**Time resolved photoluminescence:** Luminescence lifetime decays were performed using time correlated single photon counting (TCSPC) using Edinburgh Instruments FLSP920. A pulsed laser diode (377 nm) with a pulse repetition rate of 500 kHz was employed for the lifetime measurements. The PL emission decay was collected at the PL peak maximum for each sample. The instrument response function was done using a Ludox scattering solution in water. The samples were excited at 377 nm and the lifetime decays were measured at the emission wavelength maximum. The PL decay spectrum has been collected using a time-correlated single photon counting (TCSPC) technique, and the numerical fit is formatted with the F900 software. The TRPL spectra were fitted according to the equation,

$$I(t) = \sum_{i=1}^n \alpha_i \exp(-t/\tau_i)$$

where  $\alpha_i$  and  $\tau_i$  are amplitude and lifetime of  $i^{th}$  component respectively whereas n is number of components. The amplitudes bear the total contribution of individual lifetime towards the average lifetime. Average fluorescence lifetimes were enumerated using the following equation:<sup>3</sup>

$$\tau_{av} = \frac{\sum \alpha_i \tau_i^2}{\sum \alpha_i \tau_i}$$

in which  $\alpha_i$  is the pre-exponential factor corresponding to the  $i^{th}$  decay time constant,  $\tau_i$ .

We examine the photophysical behavior of APbBr<sub>3</sub> NPs as a function of A-site cation. Time resolved photoluminescence studies were carried out in solution phase shown in Figure S6. The average life-times were estimated to be 29 ns, 151 ns and 383 ns for CsPbBr<sub>3</sub>, MAPbBr<sub>3</sub> and FAPbBr<sub>3</sub> NPs, respectively after fitting the decays with a sum of three exponentials. This tri-exponential fitting indicates the contribution of multi-channel radiative recombination of excitons.

**Table S1:** Amount of starting materials

| Products                 | PbBr <sub>2</sub>    | A-site cations       |                      |                      | OABr                  | Yield (%) |
|--------------------------|----------------------|----------------------|----------------------|----------------------|-----------------------|-----------|
|                          |                      | CsBr                 | MABr                 | FABr                 |                       |           |
| Bulk CsPbBr <sub>3</sub> | 36.7 mg,<br>0.1 mmol | 21.2 mg,<br>0.1 mmol | ×                    | ×                    | ×                     | 98        |
| CsPbBr <sub>3</sub> NPs  | 36.7 mg,<br>0.1 mmol | 21.2 mg,<br>0.1 mmol | ×                    | ×                    | 12.6 mg,<br>0.06 mmol | 98        |
| Bulk MAPbBr <sub>3</sub> | 36.7 mg,<br>0.1 mmol | ×                    | 11.2 mg,<br>0.1 mmol | ×                    | ×                     | 99        |
| MAPbBr <sub>3</sub> NPs  | 36.7 mg,<br>0.1 mmol | ×                    | 11.2 mg,<br>0.1 mmol | ×                    | 12.6 mg,<br>0.06 mmol | 98        |
| Bulk FAPbBr <sub>3</sub> | 36.7 mg,<br>0.1 mmol | ×                    | ×                    | 12.5 mg,<br>0.1 mmol | ×                     | 99        |
| FAPbBr <sub>3</sub> NPs  | 36.7 mg,<br>0.1 mmol | ×                    | ×                    | 12.5 mg,<br>0.1 mmol | 12.6 mg,<br>0.06 mmol | 98        |

**Table S2:** Time-resolved photoluminescence parameters for APbBr<sub>3</sub> NPs

| Perovskite NPs      | $\tau_1$ (ns) | $\alpha_1$ | $\tau_2$ (ns) | $\alpha_2$ | $\tau_3$ (ns) | $\alpha_3$ | $\tau_{av}$ (ns) |
|---------------------|---------------|------------|---------------|------------|---------------|------------|------------------|
| CsPbBr <sub>3</sub> | 0.88          | 0.44       | 5.3           | 0.11       | 30.35         | 0.44       | 28.53            |
| MAPbBr <sub>3</sub> | 3.21          | 0.9        | 29            | 0.05       | 209           | 0.05       | 151.15           |
| FAPbBr <sub>3</sub> | 10            | 0.708      | 94            | 0.25       | 705           | 0.04       | 383.41           |

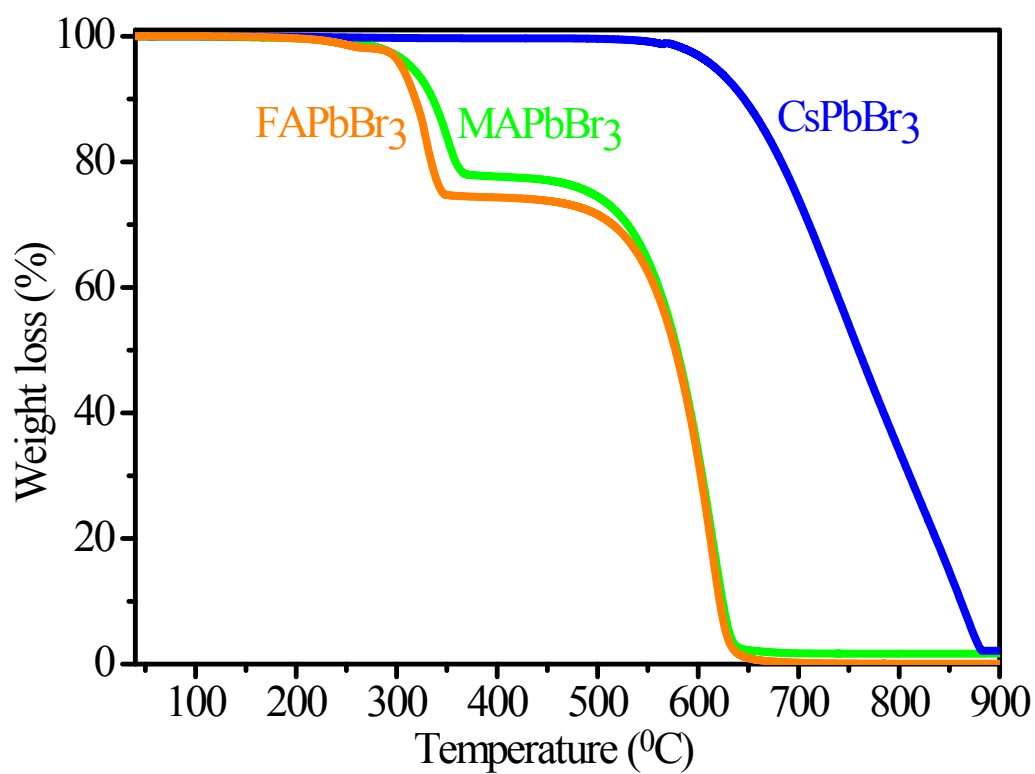

**Figure S1:** Thermogravimetric analyses of bulk MAPbBr<sub>3</sub>, FAPbBr<sub>3</sub> and CsPbBr<sub>3</sub>. More ionic nature of CsBr than MABr/FABr results in highest thermal stability of CsPbBr<sub>3</sub>.<sup>4</sup> The smaller radius of MA<sup>+</sup> than FA<sup>+</sup>,<sup>5</sup> enhances the thermal stability of MAPbBr<sub>3</sub> than FAPbBr<sub>3</sub>.

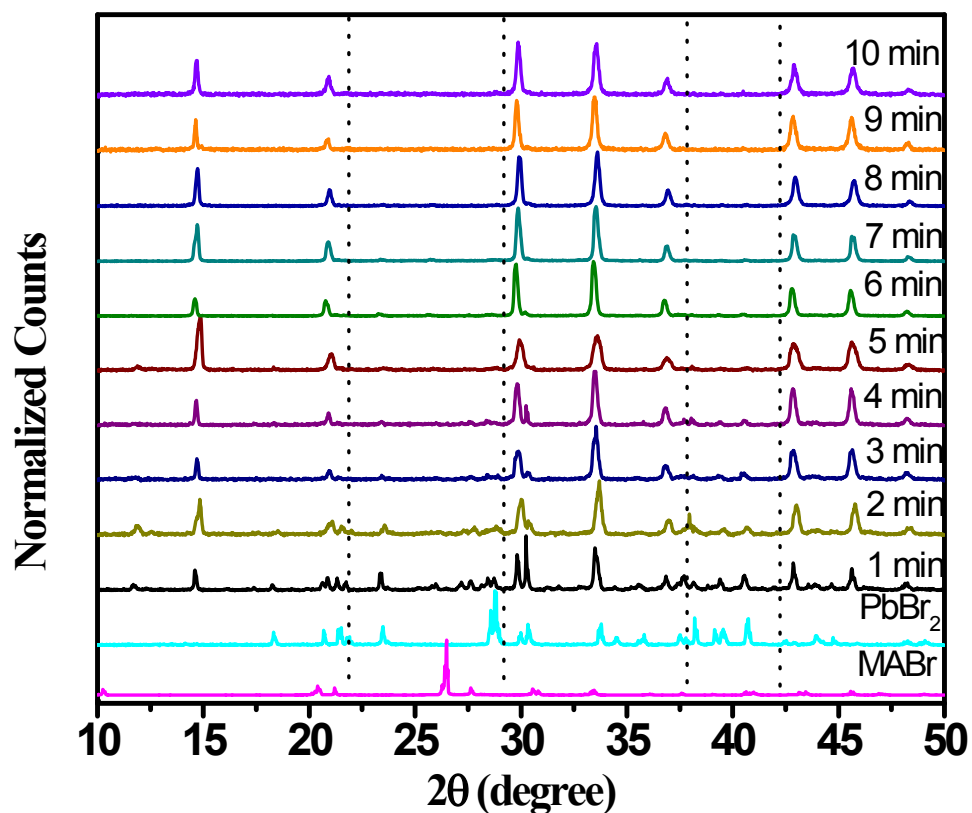

**Figures S2:** PXRD patterns of  $\text{MAPbBr}_3$  during the course of reaction,  $\text{PbBr}_2$  and  $\text{MABr}$  precursors. The powder X-ray diffraction peaks of  $\text{PbBr}_2$  and  $\text{MABr}$  gradually disappear over the grinding time and the peaks for  $\text{MAPbBr}_3$  appear within 1 minute, supporting the incorporation of  $\text{MA}^+$  into the  $\text{PbBr}_2$  crystal lattice. PXRD pattern of  $\text{MAPbBr}_3$  exhibits only the peaks of  $\text{MAPbBr}_3$  after 10 min.

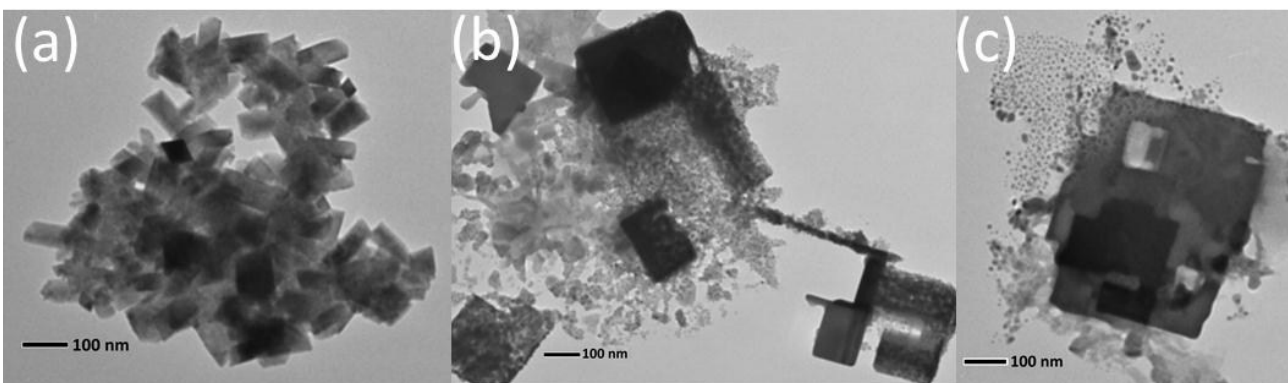

**Figure S3:** TEM images of (a)  $\text{FAPbBr}_3$  (b)  $\text{CsPbBr}_3$ , and (c)  $\text{MAPbBr}_3$  NPs. Degradation of  $\text{CsPbBr}_3$  nanoplatelets occur under the electron beam exposure.



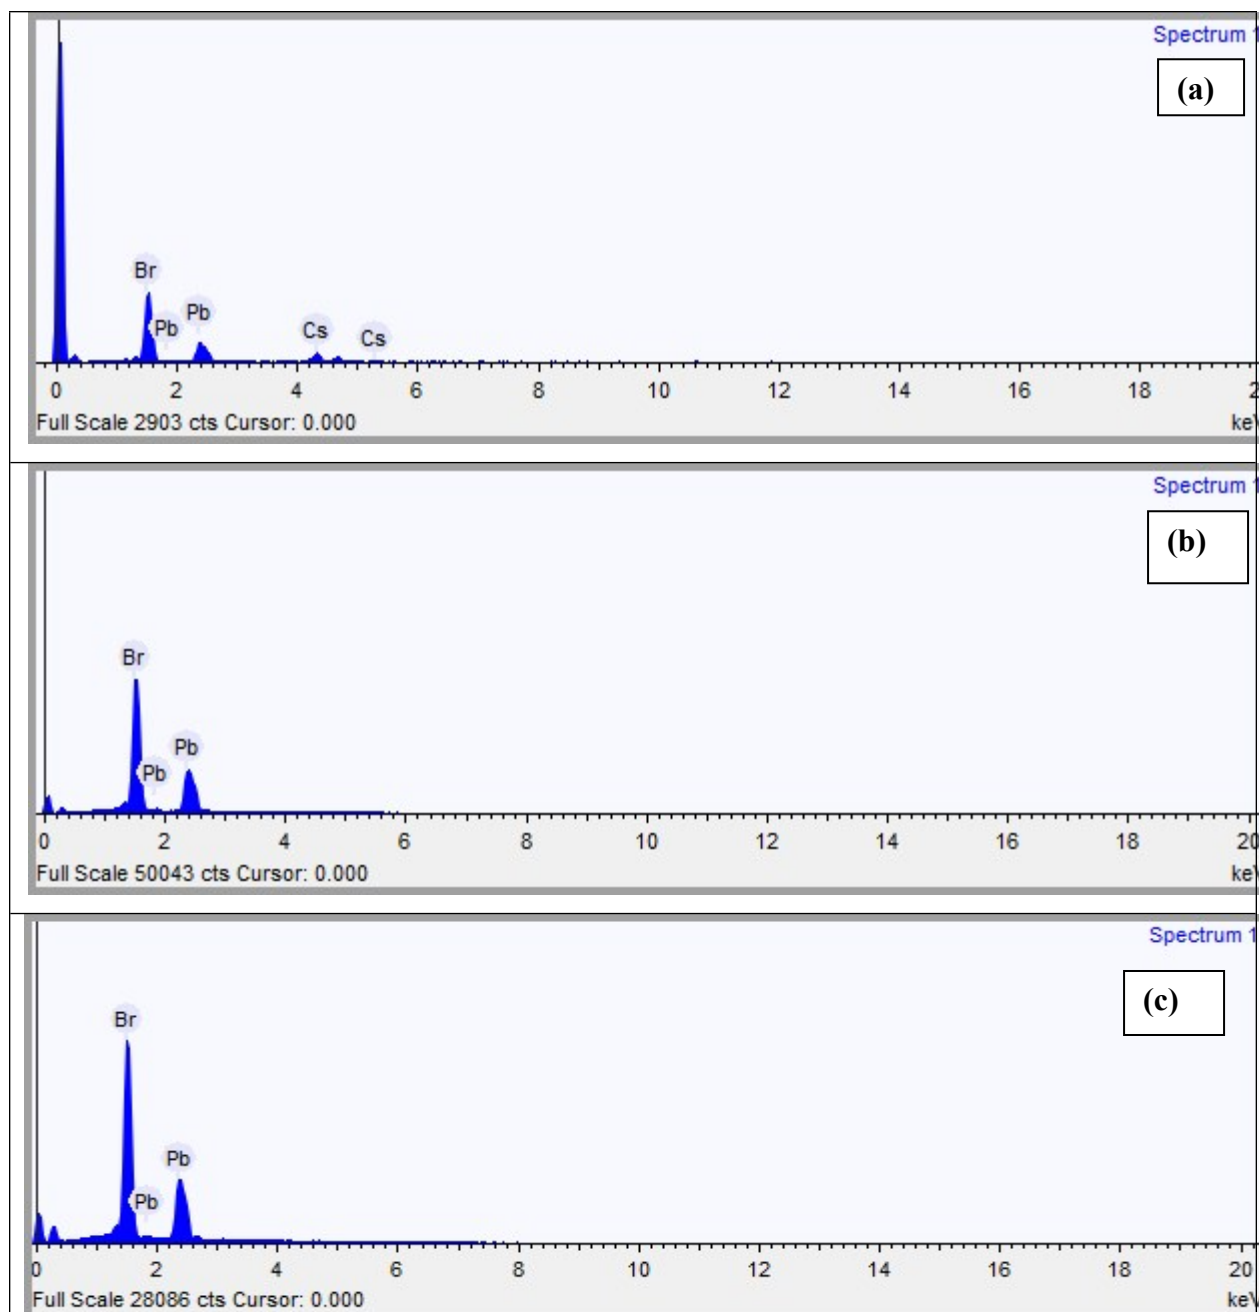

**Figure S4.** A representative energy dispersive X-ray (EDX) spectroscopy analysis of bulk (a)  $\text{CsPbBr}_3$ , (b)  $\text{MAPbBr}_3$  and (c)  $\text{FAPbBr}_3$ . The Cs:Pb:Br ratio in  $\text{CsPbBr}_3$  equal to 1:1:3. The Br:Pb ratio is 1:3 for both bulk  $\text{MAPbBr}_3$  and  $\text{FAPbBr}_3$ .

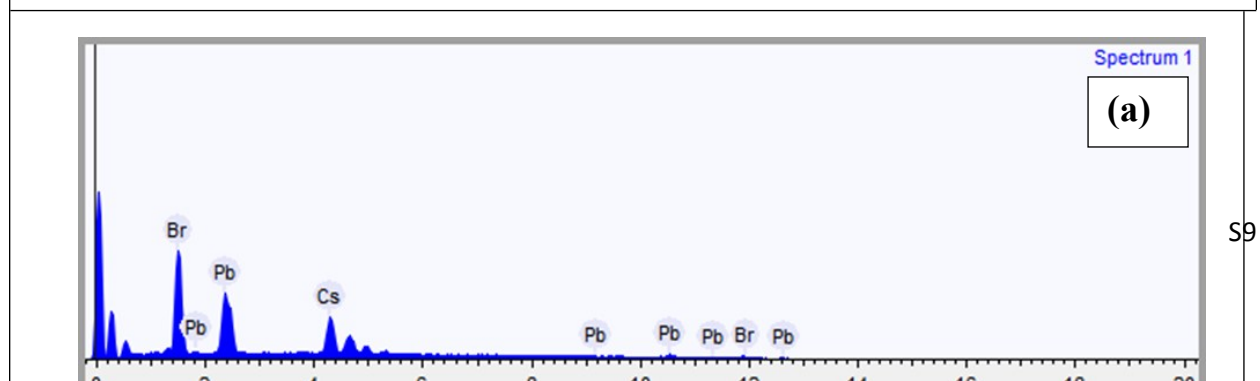

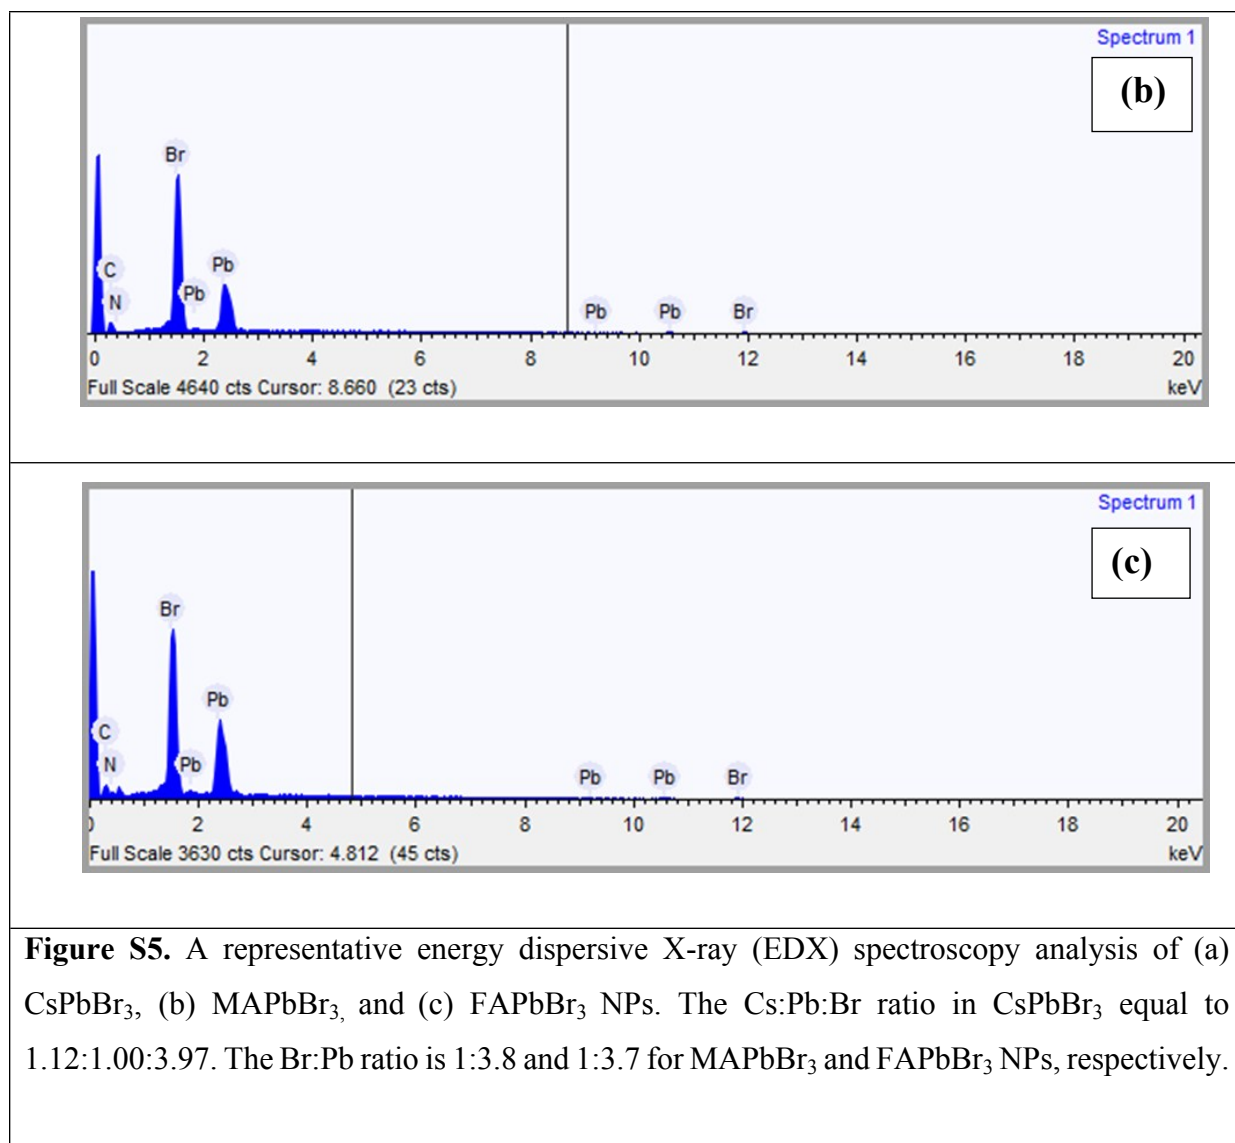

**Figure S5.** A representative energy dispersive X-ray (EDX) spectroscopy analysis of (a) CsPbBr<sub>3</sub>, (b) MAPbBr<sub>3</sub>, and (c) FAPbBr<sub>3</sub> NPs. The Cs:Pb:Br ratio in CsPbBr<sub>3</sub> equal to 1.12:1.00:3.97. The Br:Pb ratio is 1:3.8 and 1:3.7 for MAPbBr<sub>3</sub> and FAPbBr<sub>3</sub> NPs, respectively.

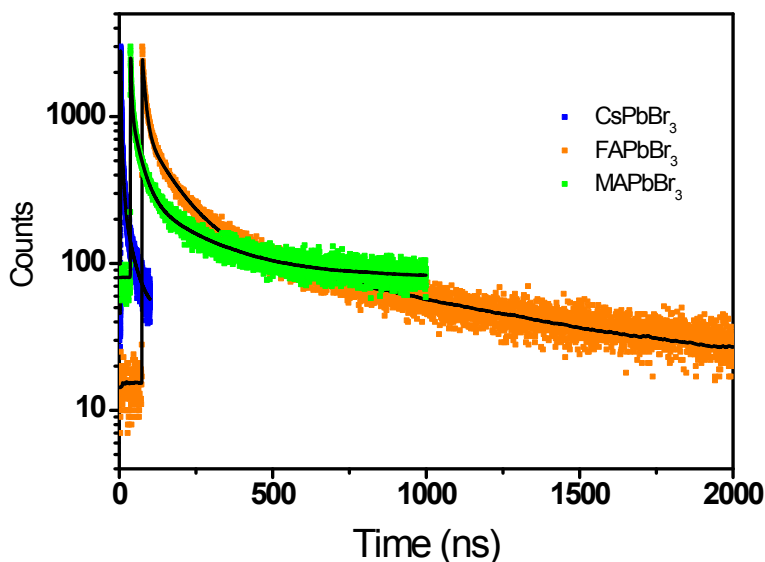

**Figure S6.** Time-resolved photoluminescence decay curves of APbBr<sub>3</sub> NPs

**Equation S1.** Calculation of quantum yield of APbBr<sub>3</sub> NPs<sup>3</sup>

$$\phi_s = \frac{OD_{standard}}{OD_{sample}} \times \frac{A_{sample}}{A_{standard}} \times \frac{\eta_{sample}^2}{\eta_{standard}^2} \times \phi_{standard}$$

$OD$  is the optical density/absorbance of the standard/sample at the excitation wavelength of 377 nm,  $A$  is the area under fluorescence spectral curve,  $\eta$  is the refractive index of different solvents.

## References

- 1 M. B. Teunis, A. Jana, P. Dutta, M. A. Johnson, M. Mandal, B. B. Muhoberac and R. Sardar, *Chem Mater*, 2016, **28**, 5043–5054.
- 2 G. E. Eperon, S. D. Stranks, C. Menelaou, M. B. Johnston, L. M. Herz and H. J. Snaith, *Energy Environ Sci*, 2014, **7**, 982.
- 3 M. Mittal, A. Jana, S. Sarkar, P. Mahadevan and S. Sapra, *J Phys Chem Lett*, 2016, **7**, 3270–3277.

- 4 M. Kulbak, S. Gupta, N. Kedem, I. Levine, T. Bendikov, G. Hodes and D. Cahen, *J Phys Chem Lett*, 2016, **7**, 3–8.
- 5 Q. Chen, N. De Marco, Y. Yang, T. Bin Song, C. C. Chen, H. Zhao, Z. Hong, H. Zhou and Y. Yang, *Nano Today*, 2015, **10**, 355–396.
